# Supplementary material for: Investigations on the field dependency of proton and charge transfer kinetics in atmospheric pressure corona discharge sources
Source: Royal Society of Chemistry journal article supplement (doi:10.1039/d5cp03612g), 2026-01-01
Supplement: d5cp03612g2.xlsx [file d5cp03612g2.xlsx]

## Sheet: Information
Different types of rates
symbol	order	unit
k	1st-order	s^-1
k'	2nd-order	m^3.molec^-1.s^-1	--> are multplied with the particle density of the neutral for a pseudo-1st order rate coefficients
			--> all rate coefficients reported are already LH-corrected, pressure-specific rate coefficients
k'_exp	2nd-order	m^3.molec^-1.s^-1	--> experimental data on observed reaction rate coefficients
Unit of E/N:	Td
Neutral particle densities used
	ppbV	m^-3		N2 particle density (800 Pa, 303 K):
H2O	5000	9.56168e+17		1.91234e+23	m^-3
NO	0	0
B/T/X	200	3.82467e+16
For the CT reaction scheme, quick equilibration between the singelt and triplet reaction complexes is assumed (as described in the manuscript) due to the negligible MECP
Teff data for the two RIPs as a function of E/N is also provided

## Sheet: H3O+
E/N	k'_12	k_21	k'_23	k_32
0	3.0685e-15	1.3871e-09	2.681e-15	7.4393
2	3.0717e-15	1.472e-09	2.683e-15	7.6475
4	3.0749e-15	1.5568e-09	2.6849e-15	7.8557
6	3.0813e-15	1.7361e-09	2.689e-15	8.3326
8	3.0908e-15	2.0528e-09	2.6952e-15	9.1058
10	3.1035e-15	2.5216e-09	2.7031e-15	10.173
12	3.1187e-15	3.2554e-09	2.7128e-15	11.634
14	3.1367e-15	4.4146e-09	2.7242e-15	13.617
16	3.1575e-15	6.2593e-09	2.7374e-15	16.313
18	3.1809e-15	9.1712e-09	2.7523e-15	19.946
20	3.207e-15	1.4082e-08	2.7693e-15	24.942
22	3.2366e-15	2.2319e-08	2.788e-15	31.784
24	3.269e-15	3.6735e-08	2.8084e-15	41.328
26	3.3041e-15	6.2752e-08	2.8308e-15	54.678
28	3.3419e-15	1.1047e-07	2.8552e-15	73.57
30	3.3833e-15	1.9982e-07	2.8813e-15	100.52
32	3.4279e-15	3.7297e-07	2.9096e-15	139.37
34	3.4753e-15	7.1512e-07	2.9399e-15	195.7
36	3.5262e-15	1.401e-06	2.9722e-15	278.41
38	3.5806e-15	2.8037e-06	3.0067e-15	400.03
40	3.6379e-15	5.7492e-06	3.0433e-15	580.43
42	3.6996e-15	1.1952e-05	3.082e-15	849.15
44	3.7644e-15	2.524e-05	3.1232e-15	1249.7
46	3.8339e-15	5.4137e-05	3.1664e-15	1851.5
48	3.9073e-15	0.00011735	3.2123e-15	2753.7
50	3.9855e-15	0.00025699	3.2605e-15	4106.1
52	4.0681e-15	0.00056676	3.3113e-15	6139.6
54	4.1566e-15	0.00126	3.3648e-15	9177.8
56	4.2504e-15	0.0028129	3.4211e-15	13712
58	4.3504e-15	0.0062919	3.4802e-15	20452
60	4.4577e-15	0.01409	3.5422e-15	30404
62	4.5726e-15	0.031568	3.6072e-15	45034
64	4.6961e-15	0.070447	3.6753e-15	66369
66	4.8294e-15	0.15685	3.7466e-15	97263
68	4.9738e-15	0.34691	3.8213e-15	141530
70	5.1309e-15	0.76217	3.8994e-15	204440
72	5.3024e-15	1.6584	3.981e-15	292920
74	5.4907e-15	3.5747	4.0661e-15	415990
76	5.699e-15	7.6111	4.1551e-15	585210
78	5.9285e-15	15.985	4.2475e-15	815180
80	6.183e-15	33.063	4.3438e-15	1123800
82	6.4633e-15	67.28	4.4437e-15	1533300
84	6.7697e-15	134.5	4.5473e-15	2069200
86	7.1005e-15	263.96	4.6546e-15	2761800
88	7.4492e-15	507.52	4.7656e-15	3645400
90	7.8094e-15	956.42	4.8805e-15	4758100
92	8.1736e-15	1764.5	4.999e-15	6141500
94	8.5366e-15	3184.6	5.1208e-15	7839000
96	8.8951e-15	5623.6	5.246e-15	9895300
98	9.2479e-15	9713.6	5.3747e-15	12355000
100	9.5941e-15	16415	5.507e-15	15260000
102	9.9341e-15	27145	5.6425e-15	18650000
104	1.027e-14	43937	5.7811e-15	22557000
106	1.0602e-14	69666	5.9236e-15	27006000
108	1.0932e-14	108230	6.0698e-15	32014000
110	1.126e-14	164870	6.2191e-15	37586000
112	1.1589e-14	246420	6.3718e-15	43717000
114	1.1919e-14	361610	6.5279e-15	50390000
116	1.2252e-14	521350	6.6881e-15	57574000
118	1.2589e-14	738910	6.8517e-15	65231000
120	1.2932e-14	1030200	7.0188e-15	73307000

## Sheet: BH+
E/N	k'_H1C	k_C1H	k'_H2C	k_C2H	k_C2.PTa	k_C2.PTb	k_C2.dehyd	k'_C1.hyd	k_C1.dehyd	k'_B.hyd	k'_exp
0	9.259e-16	0.0014104	3.6124e-16	3110.7	0.020764	101060000	79912000	1.1971e-15	2291200	2.4365e-15
2	9.2842e-16	0.0014413	3.6209e-16	3149.3	0.021123	101060000	80086000	1.1976e-15	2305400	2.4376e-15
4	9.3093e-16	0.0014732	3.6294e-16	3189.4	0.021495	101060000	80260000	1.1981e-15	2320000	2.4388e-15
6	9.3593e-16	0.0015532	3.6473e-16	3289.3	0.022424	101060000	80699000	1.1992e-15	2356400	2.4417e-15
8	9.4338e-16	0.0016713	3.674e-16	3431.5	0.02377	101070000	81300000	1.2009e-15	2407100	2.4457e-15
10	9.5321e-16	0.0018371	3.7081e-16	3624.7	0.025632	101070000	82080000	1.203e-15	2474200	2.4509e-15
12	9.6509e-16	0.0020603	3.75e-16	3874	0.028098	101070000	83033000	1.2056e-15	2557700	2.4571e-15
14	9.7902e-16	0.0023587	3.7991e-16	4188.9	0.031294	101070000	84158000	1.2086e-15	2659500	2.4646e-15
16	9.9503e-16	0.0027527	3.8564e-16	4581.3	0.035413	101080000	85455000	1.2121e-15	2780500	2.4732e-15
18	1.013e-15	0.0032738	3.9232e-16	5065.9	0.04069	101080000	86923000	1.2161e-15	2922500	2.4829e-15
20	1.0344e-15	0.0039665	3.9976e-16	5662.1	0.047452	101090000	88562000	1.2206e-15	3087300	2.4939e-15	1.63e-16
22	1.0581e-15	0.004889	4.0796e-16	6395.9	0.056173	101090000	90367000	1.2255e-15	3277100	2.506e-15	1.90333e-16
24	1.0838e-15	0.0061397	4.1727e-16	7296.6	0.067415	101100000	92339000	1.2309e-15	3494900	2.5193e-15	2.01667e-16
26	1.1115e-15	0.0078352	4.2731e-16	8406.4	0.082046	101110000	94475000	1.2368e-15	3743200	2.5338e-15	2.19e-16
28	1.1435e-15	0.010156	4.3843e-16	9777	0.1012	101110000	96770000	1.2431e-15	4025000	2.5494e-15	2.23e-16
30	1.1774e-15	0.013364	4.5043e-16	11471	0.1264	101120000	99219000	1.25e-15	4344200	2.5663e-15	2.47e-16
32	1.2137e-15	0.017846	4.6356e-16	13572	0.15978	101130000	101820000	1.2573e-15	4704700	2.5843e-15	2.54333e-16
34	1.2544e-15	0.024157	4.776e-16	16186	0.20431	101140000	104560000	1.2651e-15	5110700	2.6037e-15	2.70333e-16
36	1.297e-15	0.033107	4.9296e-16	19448	0.26414	101150000	107440000	1.2734e-15	5566800	2.6242e-15	2.88333e-16
38	1.3441e-15	0.045897	5.0935e-16	23530	0.34496	101160000	110440000	1.2821e-15	6078000	2.646e-15	3.04e-16
40	1.394e-15	0.064394	5.2694e-16	28659	0.45507	101170000	113560000	1.2914e-15	6650100	2.6691e-15	3.25333e-16
42	1.4484e-15	0.091219	5.4594e-16	35111	0.60569	101190000	116790000	1.3012e-15	7288200	2.6935e-15	3.47667e-16
44	1.506e-15	0.13042	5.6623e-16	43252	0.81306	101200000	120110000	1.3114e-15	7998600	2.7191e-15	3.64667e-16
46	1.5693e-15	0.18802	5.8789e-16	53541	1.0998	101220000	123520000	1.3221e-15	8787200	2.7461e-15	3.88333e-16
48	1.6363e-15	0.27319	6.1105e-16	66583	1.4991	101240000	126990000	1.3334e-15	9660500	2.7743e-15	4.13e-16
50	1.709e-15	0.39946	6.3578e-16	83116	2.0564	101260000	130510000	1.3451e-15	10624000	2.8039e-15	4.25667e-16
52	1.7876e-15	0.5877	6.6221e-16	104110	2.8382	101280000	134080000	1.3573e-15	11685000	2.8348e-15	4.58667e-16
54	1.8721e-15	0.86923	6.9042e-16	130780	3.9381	101300000	137660000	1.3701e-15	12849000	2.867e-15	4.7e-16
56	1.9632e-15	1.2904	7.2051e-16	164670	5.4911	101320000	141260000	1.3833e-15	14121000	2.9006e-15	4.96667e-16
58	2.0623e-15	1.9235	7.5259e-16	207700	7.688	101350000	144840000	1.397e-15	15506000	2.9355e-15	5.09333e-16
60	2.1704e-15	2.8741	7.8674e-16	262360	10.806	101370000	148390000	1.4112e-15	17008000	2.9717e-15	5.35e-16
62	2.2881e-15	4.3024	8.2307e-16	331660	15.237	101400000	151910000	1.4259e-15	18630000	3.0094e-15	5.36e-16
64	2.4169e-15	6.4523	8.6164e-16	419330	21.535	101430000	155360000	1.4411e-15	20374000	3.0486e-15	5.69333e-16
66	2.5583e-15	9.6788	9.0286e-16	530120	30.508	101470000	158740000	1.4568e-15	22241000	3.0891e-15	5.87667e-16
68	2.7153e-15	14.52	9.4657e-16	669660	43.285	101500000	162040000	1.473e-15	24230000	3.131e-15	6.15333e-16
70	2.8891e-15	21.769	9.9304e-16	844800	61.474	101540000	165240000	1.4898e-15	26338000	3.1743e-15	6.29333e-16
72	3.0826e-15	32.588	1.0424e-15	1064000	87.385	101580000	168320000	1.507e-15	28562000	3.2191e-15	6.60333e-16
74	3.3008e-15	48.72	1.0947e-15	1336900	124.22	101620000	171290000	1.5247e-15	30894000	3.2652e-15	6.87e-16
76	3.5467e-15	72.656	1.1502e-15	1675100	176.55	101660000	174130000	1.5429e-15	33327000	3.3128e-15	7.08667e-16
78	3.8252e-15	108.04	1.2089e-15	2092100	250.82	101710000	176840000	1.5616e-15	35851000	3.3618e-15	7.44e-16
80	4.1415e-15	160.18	1.2711e-15	2603100	355.96	101760000	179400000	1.5808e-15	38455000	3.4122e-15	7.86e-16
82	4.4993e-15	236.55	1.3367e-15	3224800	504.52	101810000	181820000	1.6004e-15	41126000	3.4641e-15	8.21e-16
84	4.9027e-15	347.96	1.406e-15	3976000	713.86	101870000	184100000	1.6206e-15	43849000	3.5174e-15	8.95333e-16
86	5.3492e-15	509.65	1.4789e-15	4876500	1008.2	101930000	186230000	1.6412e-15	46609000	3.5721e-15	9.69667e-16
88	5.8343e-15	742.9	1.5556e-15	5946700	1420.6	101990000	188220000	1.6623e-15	49390000	3.6282e-15	1.07667e-15
90	6.3497e-15	1077.5	1.6361e-15	7207000	1996.6	102050000	190070000	1.6839e-15	52174000	3.6857e-15	1.17667e-15
92	6.886e-15	1554.4	1.7207e-15	8676800	2798.3	102120000	191780000	1.706e-15	54946000	3.7447e-15	1.37667e-15
94	7.4347e-15	2230.2	1.8093e-15	10374000	3910.6	102190000	193370000	1.7285e-15	57688000	3.805e-15	1.58e-15
96	7.9901e-15	3181.4	1.9018e-15	12312000	5447.6	102260000	194820000	1.7515e-15	60384000	3.8667e-15	1.85333e-15
98	8.549e-15	4511.5	1.9986e-15	14500000	7562.1	102340000	196160000	1.7749e-15	63019000	3.9299e-15	2.24667e-15
100	9.1101e-15	6358.6	2.0995e-15	16943000	10461	102420000	197380000	1.7988e-15	65579000	3.9943e-15	2.67e-15
102	9.6733e-15	8906.5	2.2048e-15	19638000	14416	102500000	198500000	1.8232e-15	68051000	4.06e-15	3.21333e-15
104	1.0239e-14	12397	2.3144e-15	22576000	19788	102590000	199530000	1.848e-15	70424000	4.1271e-15	3.78e-15
106	1.081e-14	17143	2.4284e-15	25739000	27053	102680000	200460000	1.8732e-15	72689000	4.1955e-15	4.41333e-15
108	1.1386e-14	23553	2.5472e-15	29104000	36835	102780000	201320000	1.8989e-15	74839000	4.2651e-15	5.09667e-15
110	1.1971e-14	32147	2.6706e-15	32642000	49937	102870000	202100000	1.925e-15	76868000	4.3361e-15	5.75e-15
112	1.2566e-14	43586	2.7989e-15	36316000	67404	102970000	202820000	1.9515e-15	78772000	4.4086e-15	6.4e-15
114	1.3173e-14	58702	2.9322e-15	40089000	90581	103080000	203480000	1.9783e-15	80551000	4.4821e-15	6.98667e-15
116	1.3795e-14	78538	3.0707e-15	43921000	121170	103190000	204080000	2.0057e-15	82204000	4.5569e-15	7.50333e-15
118	1.4434e-14	104370	3.2146e-15	47770000	161360	103300000	204640000	2.0333e-15	83732000	4.6328e-15	7.94e-15
120	1.5092e-14	137790	3.364e-15	51597000	213850	103410000	205160000	2.0614e-15	85139000	4.7098e-15	8.38667e-15

## Sheet: TH+
E/N	k'_H1C	k_C1H	k'_H2C	k_C2H	k_C2.PTa	k_C2.PTb	k_C2.dehyd	k'_C1.hyd	k_C1.dehyd	k'_T.hyd	k'_exp
0	1.0008e-15	2.8948e-07	7.7317e-16	28443	42929	101070000	34314000	2.3705e-15	13973000	2.4022e-15
2	1.0036e-15	2.9712e-07	7.7508e-16	28780	43311	101070000	34395000	2.3713e-15	14025000	2.4032e-15
4	1.0064e-15	3.0529e-07	7.7699e-16	29127	43703	101070000	34482000	2.3722e-15	14080000	2.4043e-15
6	1.012e-15	3.2544e-07	7.8104e-16	29996	44685	101080000	34692000	2.3743e-15	14216000	2.407e-15
8	1.0203e-15	3.5551e-07	7.8704e-16	31227	46063	101080000	34981000	2.3773e-15	14402000	2.4106e-15
10	1.0312e-15	3.9859e-07	7.9473e-16	32897	47915	101080000	35357000	2.3811e-15	14647000	2.4152e-15
12	1.0445e-15	4.5844e-07	8.0416e-16	35045	50264	101090000	35815000	2.3858e-15	14948000	2.4209e-15
14	1.06e-15	5.3929e-07	8.1521e-16	37740	53172	101090000	36360000	2.3913e-15	15308000	2.4277e-15
16	1.0779e-15	6.5056e-07	8.2811e-16	41087	56720	101100000	36988000	2.3977e-15	15729000	2.4354e-15
18	1.0979e-15	8.026e-07	8.4319e-16	45189	60990	101110000	37702000	2.4049e-15	16214000	2.4443e-15
20	1.1217e-15	1.0127e-06	8.5994e-16	50197	66096	101120000	38502000	2.413e-15	16763000	2.4542e-15	1.19167e-15
22	1.1482e-15	1.307e-06	8.7842e-16	56319	72197	101130000	39388000	2.4219e-15	17381000	2.4651e-15	2.06333e-16
24	1.1768e-15	1.7218e-06	8.9944e-16	63761	79441	101140000	40358000	2.4317e-15	18070000	2.4771e-15	4.77333e-17
26	1.2078e-15	2.3145e-06	9.2207e-16	72824	88046	101150000	41414000	2.4423e-15	18832000	2.4902e-15	-2.32667e-18
28	1.2434e-15	3.1712e-06	9.4717e-16	83872	98265	101160000	42554000	2.4538e-15	19671000	2.5043e-15	-4.88e-17
30	1.2813e-15	4.4277e-06	9.7428e-16	97342	110400	101170000	43778000	2.4661e-15	20590000	2.5195e-15	5.23e-17
32	1.3219e-15	6.2871e-06	1.0039e-15	113810	124840	101190000	45083000	2.4793e-15	21591000	2.5357e-15	1.0135e-17
34	1.3673e-15	9.0837e-06	1.0357e-15	133970	142030	101210000	46468000	2.4934e-15	22677000	2.5531e-15	1.37667e-17
36	1.415e-15	1.334e-05	1.0704e-15	158650	162520	101220000	47930000	2.5083e-15	23851000	2.5716e-15	3.77333e-17
38	1.4676e-15	1.9864e-05	1.1075e-15	188970	187020	101240000	49467000	2.524e-15	25115000	2.5912e-15	5.46333e-17
40	1.5233e-15	2.9996e-05	1.1473e-15	226150	216300	101260000	51073000	2.5406e-15	26471000	2.6118e-15	1.664e-16
42	1.5843e-15	4.5859e-05	1.1903e-15	271810	251390	101290000	52746000	2.5581e-15	27919000	2.6335e-15	1.95e-16
44	1.6487e-15	7.0921e-05	1.2362e-15	327920	293520	101310000	54480000	2.5764e-15	29460000	2.6565e-15	2.118e-16
46	1.7195e-15	0.00011083	1.2853e-15	396780	344140	101340000	56269000	2.5955e-15	31094000	2.6806e-15	2.05933e-16
48	1.7945e-15	0.00017492	1.3378e-15	481220	405050	101360000	58107000	2.6156e-15	32821000	2.7058e-15	3.07e-16
50	1.8759e-15	0.00027848	1.3939e-15	584620	478410	101390000	59987000	2.6365e-15	34638000	2.7321e-15	1.24333e-16
52	1.9639e-15	0.00044653	1.4539e-15	711000	566880	101420000	61901000	2.6583e-15	36541000	2.7595e-15	3.77333e-16
54	2.0585e-15	0.00072143	1.5179e-15	865010	673580	101460000	63842000	2.6809e-15	38529000	2.7881e-15	2.68667e-16
56	2.1606e-15	0.001171	1.5863e-15	1052100	802370	101490000	65800000	2.7043e-15	40594000	2.8179e-15	2.45733e-16
58	2.2718e-15	0.0019107	1.6592e-15	1278600	957790	101530000	67767000	2.7286e-15	42732000	2.8488e-15	5.17e-16
60	2.393e-15	0.0031306	1.7368e-15	1551700	1145400	101570000	69735000	2.7537e-15	44934000	2.8808e-15	3.92333e-16
62	2.525e-15	0.0051451	1.8194e-15	1879400	1371700	101610000	71693000	2.7797e-15	47193000	2.9139e-15	5.86333e-16
64	2.6695e-15	0.00847	1.9072e-15	2270300	1644300	101660000	73633000	2.8065e-15	49500000	2.9482e-15	6.01e-16
66	2.8282e-15	0.013964	2.001e-15	2734300	1972600	101700000	75546000	2.8341e-15	51844000	2.9838e-15	6.63667e-16
68	3.0044e-15	0.023045	2.1006e-15	3281700	2367000	101750000	77424000	2.8625e-15	54215000	3.0205e-15	8.80667e-16
70	3.1997e-15	0.038033	2.2064e-15	3923400	2840100	101810000	79258000	2.8918e-15	56601000	3.0583e-15	1.16333e-15
72	3.417e-15	0.062678	2.3188e-15	4670700	3406000	101860000	81041000	2.9218e-15	58990000	3.0973e-15	1.42333e-15
74	3.6622e-15	0.10321	2.4383e-15	5534600	4080900	101920000	82766000	2.9528e-15	61371000	3.1375e-15	1.63667e-15
76	3.9385e-15	0.16956	2.5647e-15	6526600	4882800	101980000	84427000	2.9845e-15	63730000	3.1788e-15	1.85e-15
78	4.2517e-15	0.27783	2.6987e-15	7657500	5832000	102040000	86019000	3.0171e-15	66058000	3.2212e-15	2.04667e-15
80	4.6074e-15	0.45392	2.8406e-15	8936900	6949700	102110000	87537000	3.0504e-15	68341000	3.2649e-15	2.38667e-15
82	5.01e-15	0.73874	2.9905e-15	10374000	8258900	102180000	88980000	3.0844e-15	70570000	3.3096e-15	2.57333e-15
84	5.4639e-15	1.1973	3.1487e-15	11976000	9782800	102250000	90343000	3.1193e-15	72734000	3.3554e-15	2.69333e-15
86	5.9665e-15	1.932	3.3154e-15	13747000	11544000	102330000	91626000	3.155e-15	74824000	3.4024e-15	2.98e-15
88	6.5128e-15	3.1019	3.4907e-15	15693000	13564000	102410000	92828000	3.1914e-15	76833000	3.4505e-15	3.35667e-15
90	7.0933e-15	4.9539	3.6749e-15	17814000	15860000	102490000	93950000	3.2286e-15	78754000	3.4998e-15	3.45667e-15
92	7.6974e-15	7.8664	3.8684e-15	20107000	18446000	102570000	94993000	3.2665e-15	80581000	3.5501e-15	3.81333e-15
94	8.3156e-15	12.42	4.071e-15	22571000	21328000	102660000	95959000	3.3051e-15	82310000	3.6015e-15	3.85333e-15
96	8.9416e-15	19.489	4.2828e-15	25196000	24502000	102750000	96850000	3.3445e-15	83939000	3.654e-15	4.00333e-15
98	9.5716e-15	30.382	4.5044e-15	27975000	27959000	102850000	97670000	3.3847e-15	85466000	3.7076e-15	4.50333e-15
100	1.0204e-14	47.056	4.7354e-15	30895000	31674000	102950000	98423000	3.4255e-15	86891000	3.7622e-15	5.17667e-15
102	1.0839e-14	72.383	4.9766e-15	33940000	35614000	103050000	99113000	3.4671e-15	88215000	3.8178e-15	5.25667e-15
104	1.1477e-14	110.58	5.2276e-15	37095000	39736000	103150000	99743000	3.5093e-15	89440000	3.8745e-15	5.60667e-15
106	1.2121e-14	167.73	5.489e-15	40340000	43988000	103260000	100320000	3.5523e-15	90569000	3.9322e-15	5.80667e-15
108	1.2771e-14	252.6	5.7611e-15	43655000	48313000	103380000	100840000	3.5958e-15	91606000	3.9908e-15	6.34e-15
110	1.343e-14	377.71	6.0441e-15	47018000	52650000	103490000	101320000	3.6401e-15	92554000	4.0504e-15	6.72333e-15
112	1.4102e-14	560.61	6.3382e-15	50407000	56941000	103610000	101760000	3.6851e-15	93420000	4.1109e-15	6.93333e-15
114	1.4787e-14	826.01	6.644e-15	53799000	61131000	103730000	102160000	3.7306e-15	94209000	4.1724e-15	7.58667e-15
116	1.5488e-14	1208.1	6.9617e-15	57173000	65170000	103860000	102530000	3.7768e-15	94925000	4.2348e-15	7.61333e-15
118	1.6209e-14	1753.9	7.2918e-15	60505000	69018000	103990000	102860000	3.8237e-15	95575000	4.2982e-15	7.76333e-15
120	1.6952e-14	2527.6	7.6347e-15	63777000	72644000	104120000	103180000	3.8711e-15	96165000	4.3626e-15	8.50667e-15

## Sheet: XH+
E/N	k'_H1C	k_C1H	k'_H2C	k_C2H	k_C2.PTa	k_C2.PTb	k_C2.dehyd	k'_C1.hyd	k_C1.dehyd	k'_X.hyd	k'_exp
0	1.072e-15	3.561e-07	8.2165e-16	20844	404040	103410000	39057000	2.3519e-15	19330000	2.3766e-15
2	1.075e-15	3.6551e-07	8.2377e-16	21097	406890	103410000	39142000	2.3526e-15	19393000	2.3775e-15
4	1.0781e-15	3.7598e-07	8.2589e-16	21353	409790	103420000	39232000	2.3535e-15	19463000	2.3785e-15
6	1.0842e-15	4.0118e-07	8.3036e-16	22001	417100	103420000	39452000	2.3554e-15	19628000	2.3808e-15
8	1.0933e-15	4.3888e-07	8.37e-16	22917	427270	103430000	39753000	2.3582e-15	19856000	2.3841e-15
10	1.1054e-15	4.9315e-07	8.455e-16	24168	440890	103440000	40144000	2.3617e-15	20153000	2.3883e-15
12	1.1199e-15	5.6858e-07	8.5592e-16	25776	457980	103450000	40621000	2.366e-15	20520000	2.3934e-15
14	1.1369e-15	6.706e-07	8.6812e-16	27792	478890	103460000	41186000	2.3711e-15	20956000	2.3994e-15
16	1.1565e-15	8.1159e-07	8.8237e-16	30306	504140	103470000	41838000	2.377e-15	21464000	2.4064e-15
18	1.1784e-15	1.0049e-06	8.9905e-16	33395	534100	103490000	42577000	2.3837e-15	22046000	2.4143e-15
20	1.2045e-15	1.2754e-06	9.1759e-16	37193	569480	103500000	43403000	2.3911e-15	22704000	2.4231e-15	2.83e-16
22	1.2336e-15	1.652e-06	9.3801e-16	41825	610890	103520000	44316000	2.3993e-15	23440000	2.4329e-15	1.01767e-16
24	1.265e-15	2.1895e-06	9.6128e-16	47501	659290	103540000	45314000	2.4084e-15	24256000	2.4436e-15	1.57333e-16
26	1.299e-15	2.9607e-06	9.8633e-16	54437	715640	103570000	46396000	2.4181e-15	25154000	2.4553e-15	1.95667e-16
28	1.3381e-15	4.0856e-06	1.0141e-15	62938	781190	103590000	47563000	2.4287e-15	26137000	2.4679e-15	1.73333e-16
30	1.3797e-15	5.7472e-06	1.0441e-15	73374	857370	103620000	48811000	2.4401e-15	27205000	2.4814e-15	2.68667e-16
32	1.4243e-15	8.2336e-06	1.077e-15	86210	945910	103650000	50139000	2.4522e-15	28362000	2.4959e-15	1.00833e-16
34	1.4741e-15	1.1997e-05	1.1121e-15	102020	1048800	103680000	51544000	2.4651e-15	29608000	2.5113e-15	2.28e-16
36	1.5264e-15	1.7756e-05	1.1507e-15	121540	1168300	103710000	53022000	2.4788e-15	30943000	2.5277e-15	1.67667e-16
38	1.5843e-15	2.6728e-05	1.1917e-15	145700	1307500	103750000	54571000	2.4933e-15	32370000	2.545e-15	2.31e-16
40	1.6455e-15	4.0775e-05	1.2359e-15	175610	1469500	103780000	56185000	2.5086e-15	33887000	2.5634e-15	2.57667e-16
42	1.7125e-15	6.3049e-05	1.2837e-15	212700	1658300	103820000	57860000	2.5246e-15	35494000	2.5826e-15	3.14e-16
44	1.7833e-15	9.869e-05	1.3347e-15	258710	1878400	103860000	59591000	2.5414e-15	37190000	2.6028e-15	2.77667e-16
46	1.8612e-15	0.00015621	1.3892e-15	315760	2135100	103910000	61371000	2.559e-15	38971000	2.624e-15	2.89333e-16
48	1.9437e-15	0.00024979	1.4475e-15	386590	2435200	103950000	63194000	2.5773e-15	40835000	2.6462e-15	3.86e-16
50	2.0332e-15	0.00040328	1.5098e-15	474290	2785700	104000000	65052000	2.5965e-15	42777000	2.6694e-15	2.75e-16
52	2.1301e-15	0.00065688	1.5765e-15	582720	3195500	104050000	66937000	2.6165e-15	44793000	2.6934e-15	3.65667e-16
54	2.2342e-15	0.0010774	1.6477e-15	716600	3675100	104110000	68843000	2.6372e-15	46875000	2.7185e-15	3.56333e-16
56	2.3466e-15	0.0017787	1.7238e-15	881180	4235900	104160000	70760000	2.6586e-15	49017000	2.7445e-15	4.87333e-16
58	2.469e-15	0.0029523	1.8049e-15	1082900	4892100	104220000	72680000	2.6809e-15	51211000	2.7715e-15	6.65e-16
60	2.6025e-15	0.0049227	1.8914e-15	1329100	5660000	104280000	74594000	2.7038e-15	53449000	2.7994e-15	8.11667e-16
62	2.7479e-15	0.0082375	1.9834e-15	1628000	6557900	104350000	76493000	2.7275e-15	55719000	2.8283e-15	1.04e-15
64	2.9071e-15	0.013828	2.0812e-15	1988800	7607500	104410000	78371000	2.752e-15	58011000	2.8581e-15	1.33667e-15
66	3.082e-15	0.023264	2.1858e-15	2421800	8833200	104480000	80217000	2.7773e-15	60316000	2.8889e-15	1.74333e-15
68	3.2763e-15	0.03918	2.2967e-15	2937900	10263000	104560000	82024000	2.8032e-15	62621000	2.9206e-15	2.22333e-15
70	3.4916e-15	0.066049	2.4148e-15	3548700	11930000	104630000	83785000	2.8299e-15	64915000	2.9533e-15	2.53e-15
72	3.7312e-15	0.11128	2.5402e-15	4266000	13869000	104710000	85493000	2.8573e-15	67186000	2.987e-15	2.95333e-15
74	4.0017e-15	0.18742	2.6735e-15	5102100	16120000	104790000	87143000	2.8854e-15	69425000	3.0216e-15	3.50667e-15
76	4.3066e-15	0.31512	2.8146e-15	6068700	18728000	104870000	88729000	2.9143e-15	71619000	3.0572e-15	3.88e-15
78	4.6522e-15	0.52881	2.9642e-15	7177000	21742000	104960000	90246000	2.944e-15	73758000	3.0936e-15	4.31e-15
80	5.0448e-15	0.88522	3.1228e-15	8437600	25215000	105050000	91691000	2.9743e-15	75834000	3.131e-15	4.73e-15
82	5.4893e-15	1.4772	3.2903e-15	9859100	29202000	105140000	93063000	3.0053e-15	77837000	3.1692e-15	5.04667e-15
84	5.9906e-15	2.456	3.4671e-15	11449000	33763000	105240000	94358000	3.037e-15	79761000	3.2084e-15	5.42e-15
86	6.5458e-15	4.067	3.6534e-15	13213000	38957000	105340000	95576000	3.0694e-15	81599000	3.2485e-15	5.73333e-15
88	7.1493e-15	6.7032	3.8494e-15	15155000	44845000	105440000	96717000	3.1025e-15	83347000	3.2894e-15	5.98333e-15
90	7.7907e-15	11	4.0554e-15	17276000	51483000	105550000	97783000	3.1362e-15	84999000	3.3311e-15	6.33333e-15
92	8.4583e-15	17.952	4.2718e-15	19573000	58922000	105660000	98774000	3.1706e-15	86555000	3.374e-15	6.59667e-15
94	9.1418e-15	29.138	4.4986e-15	22044000	67207000	105770000	99692000	3.2057e-15	88012000	3.4175e-15	6.75e-15
96	9.8338e-15	47.019	4.7355e-15	24682000	76369000	105890000	100540000	3.2414e-15	89372000	3.4619e-15	7.04667e-15
98	1.053e-14	75.405	4.9836e-15	27477000	86425000	106000000	101320000	3.2777e-15	90634000	3.5071e-15	7.17667e-15
100	1.123e-14	120.19	5.2422e-15	30419000	97370000	106130000	102040000	3.3147e-15	91801000	3.5532e-15	7.31e-15
102	1.1932e-14	190.32	5.5123e-15	33494000	109180000	106250000	102710000	3.3524e-15	92876000	3.6001e-15	7.53667e-15
104	1.2638e-14	299.35	5.7935e-15	36686000	121820000	106380000	103310000	3.3906e-15	93863000	3.6478e-15	7.91333e-15
106	1.335e-14	467.6	6.0863e-15	39977000	135190000	106510000	103870000	3.4294e-15	94766000	3.6962e-15	7.97667e-15
108	1.4069e-14	725.36	6.3912e-15	43349000	149220000	106650000	104380000	3.4689e-15	95590000	3.7454e-15	8.29333e-15
110	1.4798e-14	1117.3	6.7083e-15	46780000	163790000	106790000	104850000	3.5089e-15	96341000	3.7954e-15	8.63333e-15
112	1.5541e-14	1708.5	7.0379e-15	50250000	178750000	106930000	105280000	3.5495e-15	97023000	3.8462e-15	8.79333e-15
114	1.6299e-14	2593.8	7.3806e-15	53738000	193960000	107080000	105680000	3.5907e-15	97643000	3.8976e-15	8.81667e-15
116	1.7075e-14	3908.8	7.7368e-15	57220000	209270000	107230000	106040000	3.6324e-15	98206000	3.9498e-15	9.04e-15
118	1.7873e-14	5846.9	8.107e-15	60677000	224510000	107380000	106380000	3.6747e-15	98717000	4.0027e-15	9.32333e-15
120	1.8695e-14	8682.5	8.4915e-15	64087000	239550000	107540000	106700000	3.7175e-15	99182000	4.0562e-15	9.12e-15

## Sheet: NO+
E/N	k'_01	k_10	k'_12	k_21
0	2.7819e-15	0.39567	2.5787e-15	17978
2	2.7841e-15	0.40562	2.5803e-15	18222
4	2.7864e-15	0.41558	2.5819e-15	18467
6	2.7907e-15	0.43738	2.5854e-15	19051
8	2.7973e-15	0.47235	2.5907e-15	19925
10	2.806e-15	0.51995	2.5973e-15	21087
12	2.8164e-15	0.58479	2.6055e-15	22593
14	2.8287e-15	0.67174	2.6151e-15	24487
16	2.843e-15	0.78703	2.6262e-15	26859
18	2.859e-15	0.93792	2.6388e-15	29773
20	2.877e-15	1.1414	2.653e-15	33365
22	2.897e-15	1.4117	2.6687e-15	37774
24	2.9189e-15	1.7752	2.6859e-15	43191
26	2.9426e-15	2.2684	2.7046e-15	49813
28	2.9681e-15	2.9391	2.725e-15	57963
30	2.9959e-15	3.8692	2.7469e-15	67977
32	3.0254e-15	5.1536	2.7705e-15	80303
34	3.0567e-15	6.9491	2.7957e-15	95493
36	3.0905e-15	9.4823	2.8226e-15	114300
38	3.126e-15	13.072	2.8512e-15	137530
40	3.1636e-15	18.166	2.8815e-15	166290
42	3.2033e-15	25.499	2.9137e-15	201900
44	3.245e-15	36.039	2.9476e-15	246030
46	3.2892e-15	51.262	2.9833e-15	300710
48	3.3352e-15	73.334	3.021e-15	368440
50	3.3839e-15	105.47	3.0606e-15	452170
52	3.4348e-15	152.27	3.1021e-15	555730
54	3.4883e-15	220.54	3.1458e-15	683280
56	3.5445e-15	320.13	3.1916e-15	840240
58	3.6032e-15	465.72	3.2396e-15	1032900
60	3.6651e-15	677.95	3.2898e-15	1268400
62	3.73e-15	987.39	3.3423e-15	1555300
64	3.798e-15	1437.3	3.3973e-15	1903500
66	3.8695e-15	2089.9	3.4548e-15	2324300
68	3.945e-15	3033.2	3.5148e-15	2829900
70	4.0245e-15	4392.1	3.5775e-15	3434900
72	4.1083e-15	6338	3.6428e-15	4154200
74	4.197e-15	9113.9	3.7111e-15	5004500
76	4.2909e-15	13048	3.7822e-15	6004000
78	4.3905e-15	18587	3.8562e-15	7170300
80	4.4966e-15	26325	3.9332e-15	8522700
82	4.6096e-15	37052	4.0133e-15	10079000
84	4.7306e-15	51800	4.0963e-15	11859000
86	4.86e-15	71881	4.1827e-15	13878000
88	4.9994e-15	98966	4.272e-15	16152000
90	5.1493e-15	135140	4.3646e-15	18693000
92	5.3106e-15	182920	4.4602e-15	21510000
94	5.4842e-15	245360	4.559e-15	24610000
96	5.6708e-15	326090	4.6612e-15	27995000
98	5.8699e-15	429260	4.7665e-15	31661000
100	6.0813e-15	559670	4.8747e-15	35602000
102	6.3045e-15	722640	4.986e-15	39804000
104	6.5359e-15	924050	5.1004e-15	44251000
106	6.7737e-15	1170200	5.2181e-15	48921000
108	7.0162e-15	1467900	5.3387e-15	53789000
110	7.2606e-15	1824100	5.4623e-15	58827000
112	7.5061e-15	2245900	5.589e-15	64000000
114	7.7527e-15	2740500	5.7192e-15	69276000
116	7.9995e-15	3314800	5.8529e-15	74619000
118	8.2478e-15	3975400	5.9895e-15	79993000
120	8.4986e-15	4728200	6.1293e-15	85361000

## Sheet: B.+
E/N	k'_C.ass	k_C.diss	k'_Ch.ass	k_Ch.diss	k_CH.dehyd	k'_C.hyd	k_prod	k'_exp
0	7.7779e-16	3.3208e-05	6.6407e-16	12.521	3368500	2.3751e-15	7.4749e-05
2	7.7966e-16	3.4115e-05	6.6553e-16	12.735	3386800	2.376e-15	7.6831e-05
4	7.8153e-16	3.5185e-05	6.6699e-16	12.991	3408700	2.3771e-15	7.9289e-05
6	7.8521e-16	3.7617e-05	6.7019e-16	13.571	3457900	2.3794e-15	8.4873e-05
8	7.9071e-16	4.1408e-05	6.7494e-16	14.431	3527600	2.3827e-15	9.3601e-05
10	7.9796e-16	4.6763e-05	6.8097e-16	15.609	3618700	2.387e-15	0.00010595
12	8.067e-16	5.4202e-05	6.8832e-16	17.186	3732900	2.3922e-15	0.00012315
14	8.1696e-16	6.4647e-05	6.9697e-16	19.237	3871100	2.3984e-15	0.0001474
16	8.2875e-16	7.8883e-05	7.0708e-16	21.889	4034900	2.4055e-15	0.00018054
18	8.4231e-16	9.8674e-05	7.1883e-16	25.304	4226400	2.4136e-15	0.00022681
20	8.5791e-16	0.00012661	7.3186e-16	29.708	4447700	2.4226e-15	0.00029242	3.94667e-15
22	8.75e-16	0.00016624	7.4631e-16	35.409	4701700	2.4326e-15	0.00038598	4.05e-15
24	8.9348e-16	0.00022295	7.6258e-16	42.818	4991000	2.4436e-15	0.00052061	4.12333e-15
26	9.1435e-16	0.00030564	7.8012e-16	52.52	5319200	2.4555e-15	0.00071805	4.20667e-15
28	9.3687e-16	0.00042782	7.9961e-16	65.265	5689500	2.4683e-15	0.0010117	4.27e-15
30	9.6083e-16	0.00061148	8.2049e-16	82.214	6106500	2.4823e-15	0.0014561	4.35e-15
32	9.8752e-16	0.00088955	8.4341e-16	104.73	6573500	2.4971e-15	0.0021337	4.42667e-15
34	1.0156e-15	0.0013177	8.6778e-16	135	7095900	2.513e-15	0.0031849	4.52e-15
36	1.0462e-15	0.0019839	8.9443e-16	175.93	7678300	2.5297e-15	0.0048331	4.6e-15
38	1.0785e-15	0.0030332	9.2283e-16	231.65	8326200	2.5476e-15	0.0074499	4.67333e-15
40	1.1134e-15	0.0047036	9.5311e-16	307.68	9044300	2.5664e-15	0.011651	4.75667e-15
42	1.1502e-15	0.0073975	9.8587e-16	412.43	9838900	2.5863e-15	0.018484	4.84333e-15
44	1.19e-15	0.011777	1.0207e-15	557.13	10715000	2.6071e-15	0.029692	4.94333e-15
46	1.2319e-15	0.01895	1.0579e-15	758.33	11679000	2.629e-15	0.048209	5.05e-15
48	1.2766e-15	0.030825	1.0974e-15	1038.5	12736000	2.652e-15	0.079141	5.16667e-15
50	1.3243e-15	0.050554	1.1396e-15	1430.9	13892000	2.6759e-15	0.131	5.27667e-15
52	1.3747e-15	0.083631	1.1844e-15	1981.2	15150000	2.7009e-15	0.21873	5.37333e-15
54	1.4281e-15	0.13923	1.2321e-15	2754.4	16517000	2.727e-15	0.36755	5.47667e-15
56	1.4854e-15	0.23332	1.2829e-15	3845.6	17995000	2.754e-15	0.62168	5.57667e-15
58	1.5461e-15	0.39259	1.3368e-15	5382.7	19587000	2.7821e-15	1.0556	5.66e-15
60	1.6106e-15	0.66357	1.394e-15	7551.8	21295000	2.8113e-15	1.8004	5.75e-15
62	1.6793e-15	1.1244	1.4547e-15	10613	23121000	2.8415e-15	3.0777	5.82667e-15
64	1.7524e-15	1.9101	1.519e-15	14923	25062000	2.8727e-15	5.2727	5.90667e-15
66	1.8304e-15	3.2467	1.5874e-15	20996	27117000	2.905e-15	9.0354	5.96333e-15
68	1.9138e-15	5.5227	1.6599e-15	29524	29282000	2.9384e-15	15.487	6.02667e-15
70	2.0029e-15	9.3862	1.7366e-15	41466	31552000	2.973e-15	26.51	6.08667e-15
72	2.0984e-15	15.936	1.818e-15	58150	33919000	3.0085e-15	45.3	6.14e-15
74	2.2008e-15	26.993	1.9041e-15	81336	36376000	3.0452e-15	77.171	6.2e-15
76	2.3116e-15	45.606	1.9952e-15	113430	38910000	3.0829e-15	131.02	6.24667e-15
78	2.4309e-15	76.768	2.0917e-15	157620	41512000	3.1217e-15	221.4	6.32333e-15
80	2.5599e-15	128.73	2.1936e-15	218070	44166000	3.1615e-15	372.28	6.36e-15
82	2.6999e-15	214.78	2.3013e-15	300190	46859000	3.2024e-15	621.98	6.37667e-15
84	2.8526e-15	356.53	2.4149e-15	410920	49577000	3.2444e-15	1032.5	6.40667e-15
86	3.0191e-15	588.25	2.5347e-15	559020	52302000	3.2874e-15	1700.7	6.41667e-15
88	3.2015e-15	964.71	2.661e-15	755220	55019000	3.3315e-15	2779.4	6.46e-15
90	3.4017e-15	1570.6	2.7938e-15	1012600	57712000	3.3768e-15	4500.1	6.49e-15
92	3.6217e-15	2538.6	2.9334e-15	1346500	60365000	3.4231e-15	7218.1	6.50667e-15
94	3.8637e-15	4071.1	3.08e-15	1775100	62963000	3.4704e-15	11459	6.53333e-15
96	4.1293e-15	6475.3	3.2337e-15	2318200	65493000	3.5187e-15	17996	6.58e-15
98	4.4198e-15	10208	3.3947e-15	2997500	67941000	3.5681e-15	27934	6.60667e-15
100	4.7351e-15	15945	3.5631e-15	3836000	70296000	3.6186e-15	42836	6.64e-15
102	5.0742e-15	24672	3.7394e-15	4856300	72549000	3.6701e-15	64869	6.66667e-15
104	5.4348e-15	37795	3.9234e-15	6079900	74692000	3.7225e-15	96950	6.69667e-15
106	5.8144e-15	57294	4.1152e-15	7525600	76718000	3.776e-15	142920	6.74333e-15
108	6.2091e-15	85919	4.3155e-15	9209000	78624000	3.8306e-15	207770	6.77667e-15
110	6.6166e-15	127410	4.5242e-15	11139000	80406000	3.886e-15	297750	6.82e-15
112	7.0346e-15	186770	4.7414e-15	13320000	82064000	3.9425e-15	420560	6.87333e-15
114	7.4623e-15	270490	4.9676e-15	15749000	83600000	3.9999e-15	585310	6.93e-15
116	7.8995e-15	386930	5.2029e-15	18414000	85014000	4.0582e-15	802720	6.99333e-15
118	8.3471e-15	546430	5.4475e-15	21301000	86311000	4.1174e-15	1084800	7.04667e-15
120	8.8067e-15	761580	5.7019e-15	24386000	87496000	4.1776e-15	1444700	7.10333e-15

## Sheet: T.+
E/N	k'_C.ass	k_C.diss	k'_Ch.ass	k_Ch.diss	k_CH.dehyd	k'_C.hyd	k_prod	k'_exp
0	8.3529e-16	1.192e-06	7.0729e-16	4.4716	11617000	2.3556e-15	1.5933
2	8.3739e-16	1.2269e-06	7.0895e-16	4.5561	11661000	2.3564e-15	1.6259
4	8.3949e-16	1.2694e-06	7.106e-16	4.6609	11716000	2.3573e-15	1.6657
6	8.4362e-16	1.3647e-06	7.1422e-16	4.8932	11837000	2.3595e-15	1.7544
8	8.498e-16	1.5136e-06	7.1959e-16	5.2406	12008000	2.3626e-15	1.8886
10	8.5793e-16	1.7273e-06	7.2642e-16	5.7231	12230000	2.3665e-15	2.0751
12	8.6774e-16	2.0303e-06	7.3474e-16	6.376	12506000	2.3713e-15	2.3279
14	8.7925e-16	2.4542e-06	7.4451e-16	7.2298	12835000	2.3769e-15	2.6641
16	8.9247e-16	3.0493e-06	7.5596e-16	8.3573	13222000	2.3835e-15	3.1088
18	9.0769e-16	3.8915e-06	7.6927e-16	9.8305	13667000	2.3909e-15	3.6973
20	9.2522e-16	5.0977e-06	7.8403e-16	11.763	14174000	2.3992e-15	4.4788	3.18667e-15
22	9.4441e-16	6.8391e-06	8.0039e-16	14.332	14746000	2.4084e-15	5.5189	3.25667e-15
24	9.6515e-16	9.4296e-06	8.1884e-16	17.735	15386000	2.4185e-15	6.928	3.29667e-15
26	9.8861e-16	1.3298e-05	8.3872e-16	22.299	16097000	2.4294e-15	8.8362	3.35333e-15
28	1.0139e-15	1.9172e-05	8.6084e-16	28.465	16883000	2.4412e-15	11.444	3.4e-15
30	1.0409e-15	2.825e-05	8.8453e-16	36.841	17746000	2.454e-15	15.047	3.45333e-15
32	1.0709e-15	4.2518e-05	9.1055e-16	48.376	18692000	2.4675e-15	20.068	3.51e-15
34	1.1024e-15	6.5257e-05	9.3823e-16	64.336	19723000	2.4821e-15	27.119	3.57333e-15
36	1.1369e-15	0.00010197	9.6853e-16	86.579	20843000	2.4975e-15	37.09	3.64e-15
38	1.1732e-15	0.000162	1.0008e-15	117.95	22054000	2.5137e-15	51.288	3.70333e-15
40	1.2126e-15	0.00026205	1.0353e-15	162.27	23359000	2.531e-15	71.725	3.77667e-15
42	1.254e-15	0.00042987	1.0726e-15	225.48	24761000	2.5491e-15	101.2	3.85e-15
44	1.2989e-15	0.00071499	1.1123e-15	316.23	26261000	2.5681e-15	144.01	3.95e-15
46	1.3461e-15	0.0012038	1.1546e-15	447.01	27860000	2.588e-15	206.41	4.05e-15
48	1.3966e-15	0.0020517	1.1997e-15	636.49	29557000	2.6089e-15	297.82	4.17e-15
50	1.4504e-15	0.0035306	1.2478e-15	911.99	31353000	2.6307e-15	431.89	4.29333e-15
52	1.5073e-15	0.0061353	1.299e-15	1314.1	33244000	2.6534e-15	629.22	4.42e-15
54	1.5676e-15	0.010752	1.3535e-15	1902	35228000	2.6771e-15	919.95	4.55667e-15
56	1.6323e-15	0.018956	1.4114e-15	2764	37301000	2.7016e-15	1347.6	4.70667e-15
58	1.701e-15	0.033655	1.4731e-15	4027.5	39457000	2.7271e-15	1977.4	4.84e-15
60	1.7739e-15	0.060017	1.5385e-15	5880.2	41688000	2.7535e-15	2902.2	4.97667e-15
62	1.8515e-15	0.10739	1.608e-15	8593.4	43988000	2.7808e-15	4255.7	5.11667e-15
64	1.9343e-15	0.19291	1.6816e-15	12562	46347000	2.8091e-15	6233.1	5.25e-15
66	2.0226e-15	0.34693	1.76e-15	18345	48754000	2.8382e-15	9104	5.36667e-15
68	2.117e-15	0.62471	1.843e-15	26747	51198000	2.8683e-15	13253	5.47333e-15
70	2.218e-15	1.1254	1.9309e-15	38891	53666000	2.8992e-15	19211	5.58e-15
72	2.3261e-15	2.0248	2.0244e-15	56330	56147000	2.9312e-15	27703	5.68667e-15
74	2.4422e-15	3.6396	2.1231e-15	81217	58626000	2.9642e-15	39722	5.78667e-15
76	2.5678e-15	6.5257	2.2278e-15	116440	61091000	2.998e-15	56578	5.89333e-15
78	2.703e-15	11.664	2.3387e-15	165840	63527000	3.0327e-15	80006	5.99667e-15
80	2.8495e-15	20.775	2.4558e-15	234430	65923000	3.0683e-15	112270	6.10333e-15
82	3.0084e-15	36.83	2.5796e-15	328550	68265000	3.1049e-15	156220	6.23e-15
84	3.1817e-15	64.989	2.7103e-15	456160	70542000	3.1423e-15	215510	6.34333e-15
86	3.3709e-15	114.03	2.8481e-15	626950	72743000	3.1807e-15	294590	6.46e-15
88	3.578e-15	198.89	2.9935e-15	852300	74859000	3.2199e-15	398960	6.57e-15
90	3.8056e-15	344.46	3.1465e-15	1145500	76881000	3.26e-15	535060	6.67333e-15
92	4.0557e-15	592.28	3.3074e-15	1521100	78804000	3.301e-15	710570	6.78e-15
94	4.3309e-15	1010.7	3.4762e-15	1995300	80622000	3.343e-15	934370	6.87e-15
96	4.633e-15	1710.5	3.6534e-15	2584600	82331000	3.3858e-15	1216400	6.96e-15
98	4.9636e-15	2868.9	3.8392e-15	3305900	83929000	3.4295e-15	1567800	7.03667e-15
100	5.3225e-15	4767.7	4.0334e-15	4175900	85417000	3.474e-15	2000700	7.13e-15
102	5.7086e-15	7847.2	4.2368e-15	5209900	86794000	3.5194e-15	2527900	7.20667e-15
104	6.1194e-15	12785	4.4492e-15	6421500	88063000	3.5656e-15	3162900	7.28e-15
106	6.5519e-15	20602	4.6708e-15	7822300	89227000	3.6127e-15	3919200	7.35333e-15
108	7.0016e-15	32828	4.902e-15	9421000	90290000	3.6606e-15	4810400	7.42667e-15
110	7.4661e-15	51687	5.1431e-15	11223000	91258000	3.7092e-15	5849100	7.49667e-15
112	7.9427e-15	80367	5.3942e-15	13231000	92135000	3.7587e-15	7047100	7.57333e-15
114	8.4304e-15	123320	5.6556e-15	15443000	92928000	3.809e-15	8414500	7.64e-15
116	8.929e-15	186690	5.9276e-15	17854000	93643000	3.86e-15	9959700	7.71e-15
118	9.4396e-15	278550	6.2105e-15	20456000	94287000	3.9118e-15	11688000	7.77333e-15
120	9.9639e-15	409420	6.5048e-15	23237000	94866000	3.9644e-15	13602000	7.84667e-15

## Sheet: X.+
E/N	k'_C.ass	k_C.diss	k'_Ch.ass	k_Ch.diss	k_CH.dehyd	k'_C.hyd	k_prod	k'_exp
0	8.9017e-16	9.487e-09	7.4876e-16	0.10253	28338000	2.3399e-15	3300.6
2	8.9249e-16	9.7734e-09	7.506e-16	0.10457	28410000	2.3406e-15	3343.9
4	8.9481e-16	1.0124e-08	7.5243e-16	0.10706	28498000	2.3415e-15	3396.8
6	8.9936e-16	1.0913e-08	7.5645e-16	0.11267	28693000	2.3435e-15	3514.7
8	9.0617e-16	1.2138e-08	7.6241e-16	0.12103	28966000	2.3462e-15	3687
10	9.1513e-16	1.391e-08	7.6999e-16	0.13274	29319000	2.3498e-15	3920
12	9.2595e-16	1.646e-08	7.7922e-16	0.14863	29753000	2.3541e-15	4225
14	9.3862e-16	1.9996e-08	7.9006e-16	0.16947	30267000	2.3592e-15	4609.9
16	9.5319e-16	2.5048e-08	8.0276e-16	0.19727	30864000	2.3651e-15	5095.2
18	9.6996e-16	3.2236e-08	8.1754e-16	0.23389	31544000	2.3719e-15	5699.2
20	9.893e-16	4.2575e-08	8.3393e-16	0.28264	32308000	2.3794e-15	6447.4	1.24667e-15
22	1.0105e-15	5.7907e-08	8.5209e-16	0.3475	33156000	2.3876e-15	7379	1.25333e-15
24	1.0333e-15	8.0654e-08	8.726e-16	0.43499	34090000	2.3967e-15	8532.5	1.26e-15
26	1.0592e-15	1.1516e-07	8.9469e-16	0.55351	35109000	2.4065e-15	9965.7	1.28667e-15
28	1.0872e-15	1.6841e-07	9.1929e-16	0.71549	36215000	2.4172e-15	11750	1.29667e-15
30	1.1169e-15	2.5156e-07	9.4563e-16	0.94049	37407000	2.4286e-15	13972	1.32333e-15
32	1.1501e-15	3.8484e-07	9.746e-16	1.2538	38685000	2.4409e-15	16755	1.35e-15
34	1.1849e-15	6.0049e-07	1.0054e-15	1.6956	40048000	2.4539e-15	20241	1.37333e-15
36	1.2229e-15	9.5458e-07	1.0391e-15	2.3237	41495000	2.4677e-15	24614	1.39667e-15
38	1.2631e-15	1.5484e-06	1.0751e-15	3.2252	43024000	2.4823e-15	30123	1.42667e-15
40	1.3067e-15	2.5503e-06	1.1135e-15	4.5292	44632000	2.4977e-15	37053	1.45667e-15
42	1.3524e-15	4.271e-06	1.1551e-15	6.4336	46316000	2.5139e-15	45796	1.49333e-15
44	1.4021e-15	7.2663e-06	1.1994e-15	9.2383	48072000	2.5309e-15	56836	1.51667e-15
46	1.4543e-15	1.2529e-05	1.2466e-15	13.389	49894000	2.5487e-15	70769	1.55667e-15
48	1.5101e-15	2.1865e-05	1.297e-15	19.579	51778000	2.5673e-15	88346	1.59e-15
50	1.5697e-15	3.8589e-05	1.3506e-15	28.859	53717000	2.5867e-15	110510	1.62667e-15
52	1.6327e-15	6.8845e-05	1.4078e-15	42.848	55703000	2.6069e-15	138420	1.66333e-15
54	1.6995e-15	0.0001239	1.4687e-15	64.023	57730000	2.6279e-15	173520	1.69667e-15
56	1.7712e-15	0.00022482	1.5336e-15	96.254	59788000	2.6497e-15	217560	1.73667e-15
58	1.8473e-15	0.00041065	1.6025e-15	145.43	61867000	2.6723e-15	272660	1.76667e-15
60	1.9281e-15	0.00075483	1.6758e-15	220.64	63960000	2.6957e-15	341410	1.80667e-15
62	2.0142e-15	0.0013939	1.7536e-15	336.03	66056000	2.7198e-15	426880	1.84e-15
64	2.106e-15	0.002584	1.836e-15	513.09	68145000	2.7448e-15	532740	1.87e-15
66	2.204e-15	0.0048031	1.9238e-15	785.39	70217000	2.7705e-15	663270	1.89667e-15
68	2.3087e-15	0.00895	2.0169e-15	1203.7	72261000	2.797e-15	823550	1.92667e-15
70	2.4208e-15	0.016698	2.1155e-15	1846.7	74269000	2.8242e-15	1019300	1.95333e-15
72	2.541e-15	0.031137	2.2203e-15	2833.2	76232000	2.8523e-15	1257200	1.97333e-15
74	2.6699e-15	0.058086	2.3312e-15	4344.7	78140000	2.881e-15	1544700	2.00667e-15
76	2.8094e-15	0.10818	2.4487e-15	6654	79986000	2.9107e-15	1890000	2.02667e-15
78	2.9597e-15	0.20102	2.5732e-15	10171	81763000	2.9411e-15	2302300	2.05333e-15
80	3.1225e-15	0.37283	2.7048e-15	15509	83464000	2.9722e-15	2791600	2.07667e-15
82	3.2992e-15	0.68876	2.8438e-15	23566	85086000	3.0041e-15	3368200	2.10667e-15
84	3.4919e-15	1.2675	2.9907e-15	35676	86624000	3.0367e-15	4043300	2.12667e-15
86	3.7024e-15	2.3229	3.1458e-15	53752	88075000	3.0701e-15	4828300	2.14667e-15
88	3.9329e-15	4.2351	3.3092e-15	80553	89438000	3.1042e-15	5734500	2.16667e-15
90	4.1861e-15	7.6789	3.4814e-15	119920	90712000	3.1391e-15	6773100	2.19333e-15
92	4.4646e-15	13.839	3.6624e-15	177300	91898000	3.1746e-15	7954700	2.21667e-15
94	4.771e-15	24.789	3.8525e-15	260000	92996000	3.2109e-15	9289100	2.24e-15
96	5.1075e-15	44.109	4.052e-15	377780	94010000	3.2479e-15	10785000	2.26e-15
98	5.4758e-15	77.904	4.2613e-15	543490	94942000	3.2855e-15	12448000	2.28333e-15
100	5.8758e-15	136.64	4.4801e-15	773140	95796000	3.3241e-15	14284000	2.30333e-15
102	6.3062e-15	237.77	4.7093e-15	1086600	96576000	3.3631e-15	16295000	2.32667e-15
104	6.7641e-15	410.44	4.9487e-15	1507100	97286000	3.4029e-15	18480000	2.35e-15
106	7.2463e-15	702.61	5.1985e-15	2061000	97932000	3.4434e-15	20836000	2.37333e-15
108	7.7479e-15	1193	5.4593e-15	2776600	98518000	3.4845e-15	23358000	2.39e-15
110	8.2661e-15	2007.7	5.7312e-15	3682300	99050000	3.5263e-15	26035000	2.41333e-15
112	8.7978e-15	3348.8	6.0144e-15	4805500	99532000	3.5688e-15	28856000	2.43e-15
114	9.3419e-15	5535.4	6.3093e-15	6169000	99969000	3.6119e-15	31806000	2.45e-15
116	9.8984e-15	9064.2	6.6163e-15	7790700	100370000	3.6556e-15	34867000	2.46333e-15
118	1.0468e-14	14699	6.9356e-15	9680600	100730000	3.6999e-15	38020000	2.48e-15
120	1.1054e-14	23607	7.2678e-15	11842000	101060000	3.745e-15	41244000	2.48e-15

## Sheet: Teff_data
E/N	Teff(H3O+(H2O)n)	Teff(NO+(H2O)n)
0	303	303
2	303.24	303.25
4	303.49	303.51
6	304.04	304.07
8	304.86	304.91
10	305.9	305.99
12	307.18	307.33
14	308.69	308.92
16	310.45	310.78
18	312.44	312.9
20	314.67	315.28
22	317.15	317.93
24	319.88	320.85
26	322.86	324.04
28	326.09	327.5
30	329.59	331.23
32	333.36	335.24
34	337.42	339.53
36	341.77	344.1
38	346.44	348.96
40	351.47	354.11
42	356.9	359.56
44	362.79	365.3
46	369.23	371.36
48	376.29	377.74
50	384.06	384.45
52	392.58	391.5
54	401.78	398.92
56	411.5	406.71
58	421.53	414.9
60	431.73	423.52
62	442.13	432.6
64	452.84	442.19
66	463.95	452.34
68	475.5	463.12
70	487.53	474.61
72	500.05	486.87
74	513.1	499.97
76	526.7	513.98
78	540.9	528.9
80	555.75	544.75
82	571.41	561.53
84	588.13	579.34
86	606.45	598.29
88	627.35	618.53
90	652.53	640.24
92	684.6	663.54
94	727	688.58
96	783.17	715.44
98	854.57	744.11
100	938.14	774.52
102	1025.5	806.47
104	1106.5	839.67
106	1175.3	873.8
108	1233.6	908.52
110	1285.6	943.59
112	1334.1	978.83
114	1380.5	1014.2
116	1425.6	1049.6
118	1470.1	1085.1
120	1514.5	1121
